# Supplementary material for: A chiral layered Co(ii) coordination polymer with helical chains from achiral materials
Source: Royal Society of Chemistry journal article supplement (doi:10.1039/b417184e), 2005-01-01
Supplement: b417184e.pdf [file b417184e.pdf]

## **A chiral layered Co(II) coordination polymer with helical chains from achiral materials**

Ge Tian,<sup>a</sup> Guangshan Zhu,<sup>\*a</sup> Xiaoyu Yang,<sup>a</sup> Qianrong Fang,<sup>a</sup> Ming Xue,<sup>a</sup> Jinyu Sun,<sup>a</sup>  
Yan Wei,<sup>\*b</sup> and Shilun Qiu<sup>\*a</sup>

<sup>a</sup>State Key Laboratory of Inorganic Synthesis and Preparative Chemistry, Department of Chemistry, Jilin University, Changchun, 130012, China. Fax: +86-431-5168331; Tel: +86-431-5168331; E-mail: [sqiu@mail.jlu.edu.cn](mailto:sqiu@mail.jlu.edu.cn) (S. Qiu).

<sup>b</sup>Department of Chemistry, Drexel University, Philadelphia, PA 19104, USA. E-mail: [weiyang@drexel.edu](mailto:weiyang@drexel.edu) (Y. Wei)

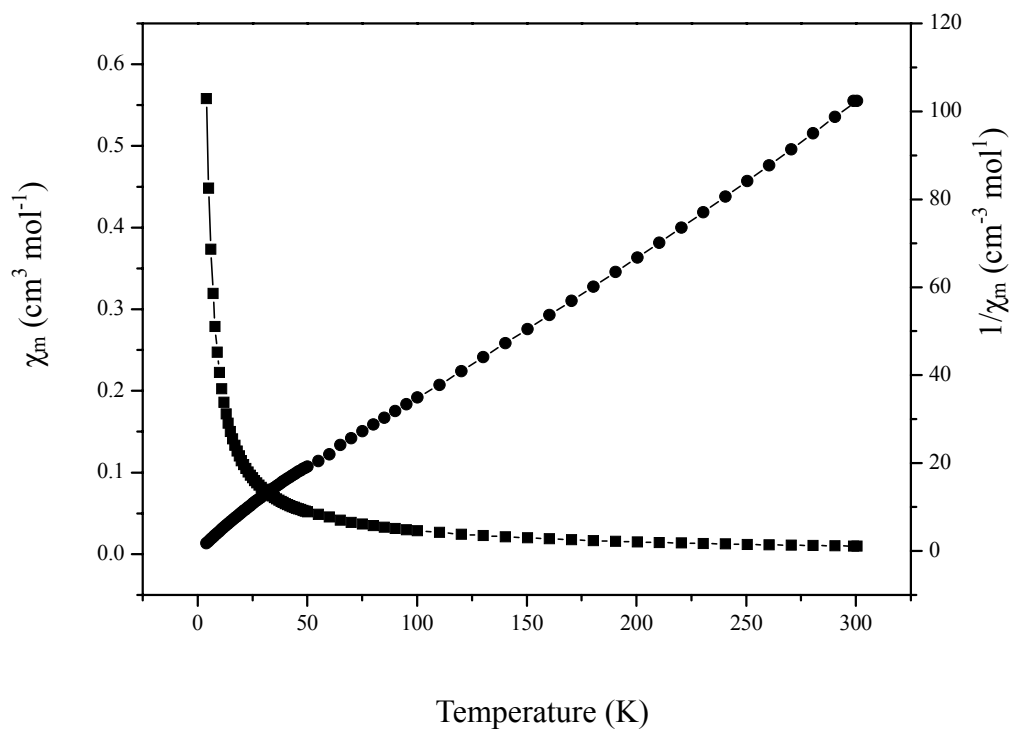

Figure S1. The  $\chi_m$  vs. T and the  $1/\chi_m$  vs. T plots of  $\text{Co(PDC)(H}_2\text{O)}_2 \cdot (\text{H}_2\text{O})$ .
